# Supplementary material for: Natural 2′,4-Dihydroxy-4′,6′-dimethoxy Chalcone Isolated from Chromolaena tacotana Inhibits Breast Cancer Cell Growth through Autophagy and Mitochondrial Apoptosis
Source: MDPI journal article supplement (doi:10.3390/plants13050570), 2024-02-20
Supplement: s1 [file s1]

# SUPPLEMENTARY INFORMATION

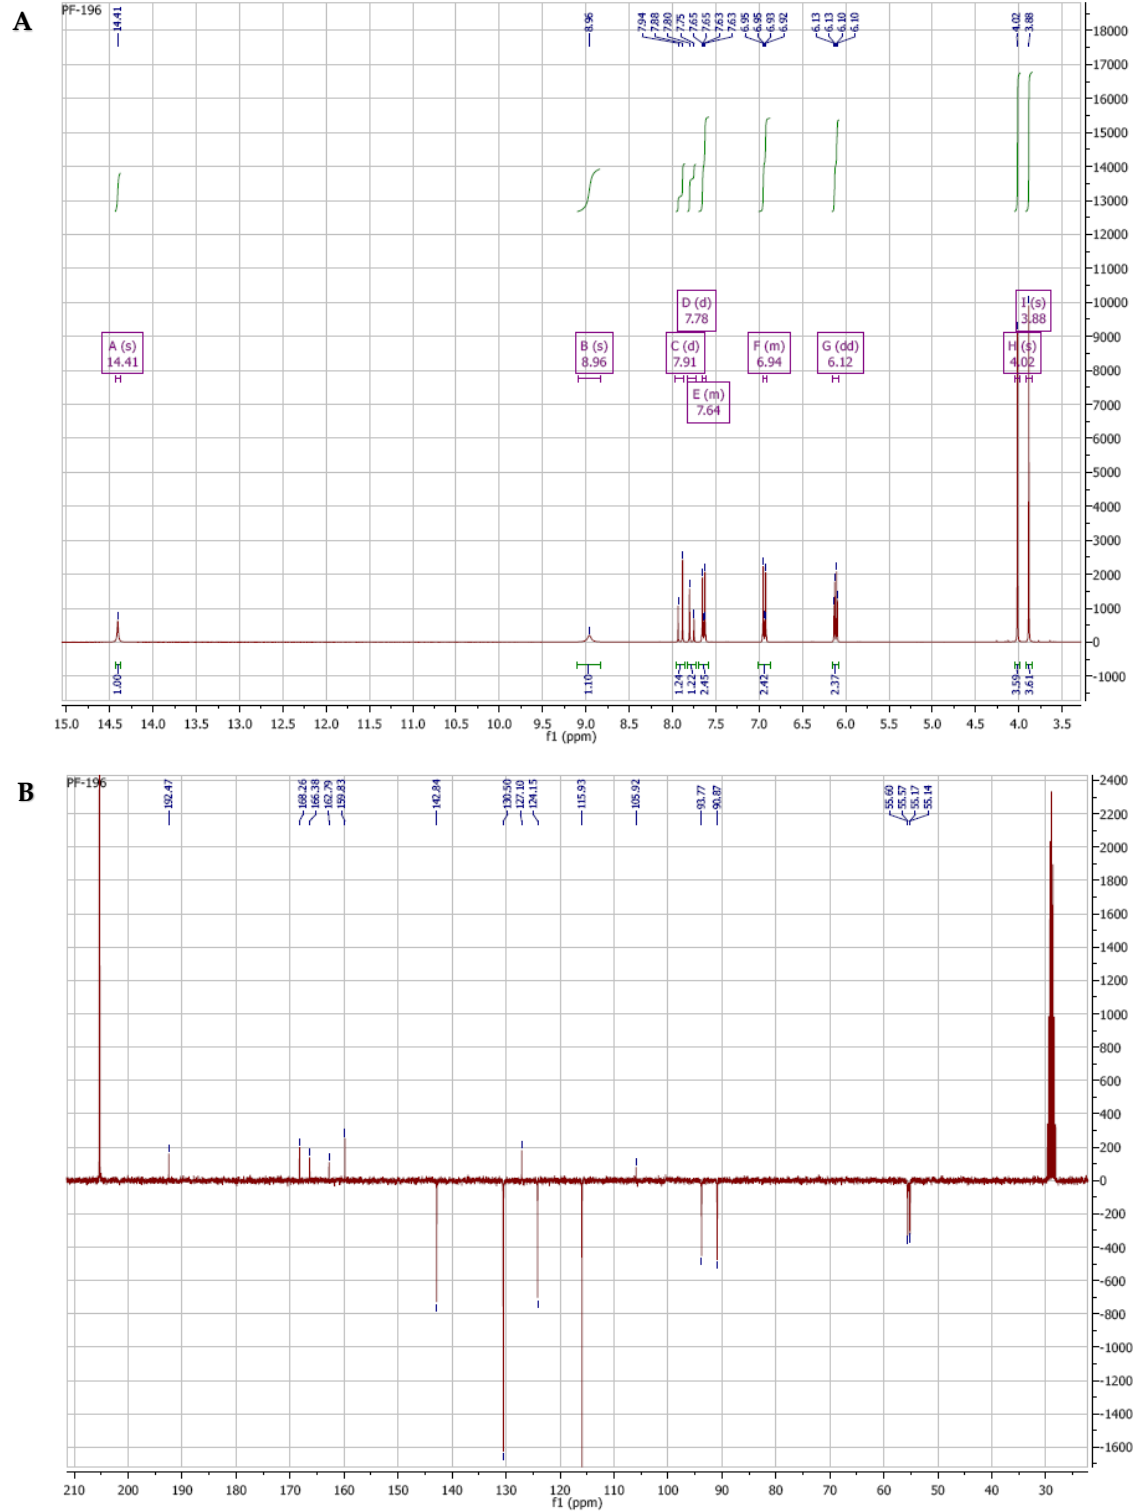

**Figure S1:** Nuclear Magnetic Resonance Spectroscopy of 2'4-dihydroxi-4',6'-dimetoxichalcona: A.  $^1\text{H}$  NMR and B.  $^{13}\text{C}$  NMR spectrum.

# <Spectrum>

Line#:1 R.Time:---(Scan#:---)  
MassPeaks:20411  
RawMode:Averaged 0.533-0.913(321-549) BasePeak:655.1749(496287)  
BG Mode:None Segment 1 - Event 1

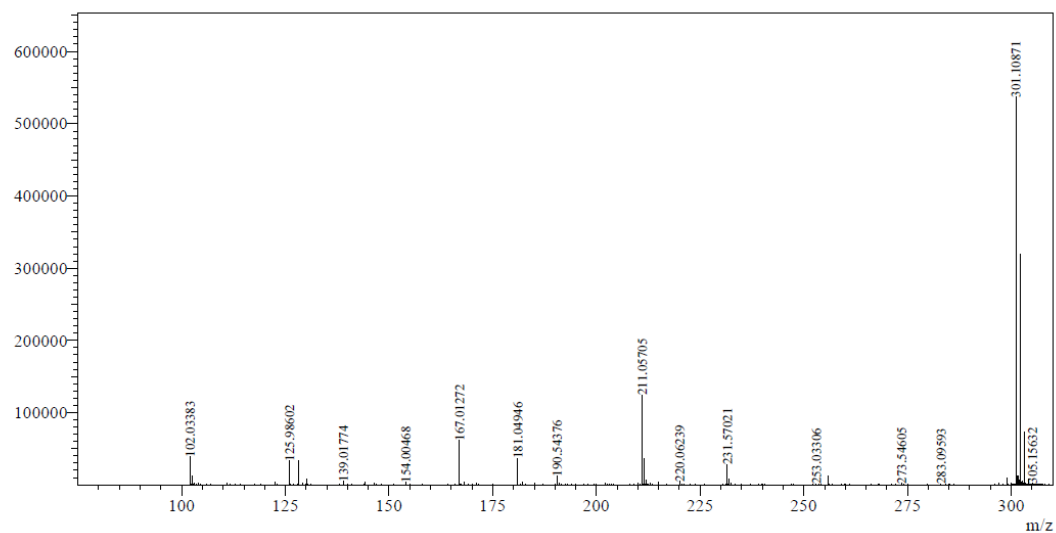

**Figure S2.** HPLC/QTOF analysis in the ESI positive-ion mode of 2'-dihydroxy-4',6'-dimetoxichalcona  $[M + H]^+$ : 301.10871.
